## Soil Chemistry and Microbiome Determine N<sub>2</sub>O Emission Potential in Soils

1 Matthew P. Highton<sup>1,\*</sup>, Lars R. Bakken<sup>2</sup>, Peter Dörsch<sup>3</sup>, Sven Tobias-Hunefeldt<sup>1</sup>, Lars  
2 Molstad<sup>3</sup>, Sergio E. Morales<sup>1,\*</sup>

3

4 <sup>1</sup>Department of Microbiology and Immunology, University of Otago, Dunedin, New  
5 Zealand

6 <sup>2</sup>Faculty of Chemistry, Biotechnology and Food Science, Norwegian University of Life  
7 Sciences, Ås, Norway

8 <sup>3</sup>Faculty of Environmental Sciences and Natural Resource Management, Norwegian  
9 University of Life Sciences, Ås, Norway

10 \*Corresponding Authors

11

## Abstract

12 Microbial nitrogen (N) transformations in soil, notably denitrification, result in the  
13 production of the potent greenhouse and ozone depleting gas nitrous oxide (N<sub>2</sub>O). Soil  
14 chemistry and microbiome composition impact N<sub>2</sub>O emission potential but the relative  
15 importance of these factors as determinants of N<sub>2</sub>O emission in denitrifying systems is  
16 rarely tested. In addition, previous linkages between microbiome composition and N<sub>2</sub>O  
17 emission potential rarely demonstrate causality. Here, we determined the relative impact of  
18 microbiome composition (i.e. soil extracted cells) and chemistry (i.e. water extractable  
19 chemicals) on N<sub>2</sub>O emission potential utilizing an anoxic cell based assay system. Cells and  
20 chemistry for assays were sourced from soils with contrasting N<sub>2</sub>O/N<sub>2</sub>O+N<sub>2</sub> ratios,  
21 combined in various combinations and denitrification gas production was measured in  
22 response to nitrate addition. Average directionless effects of cell and chemical extract on  
23 N<sub>2</sub>O/N<sub>2</sub>O+N<sub>2</sub> (Cell: Δ0.16, Chemical extract: Δ0.22) and total N<sub>2</sub>O hypothetically emitted  
24 (Cell: Δ2.62 μmol-N, Chemical extract: Δ4.14 μmol-N) indicated chemistry is the most  
25 important determinant of N<sub>2</sub>O emissions. Independent pH differences of just 0.6 points  
26 impacted N<sub>2</sub>O/N<sub>2</sub>O+N<sub>2</sub> on par with independent chemical extract differences, supporting  
27 the dominance of this variable in previous studies. However, impacts on overall N<sub>2</sub>O  
28 hypothetically emitted were smaller suggesting that soil pH manipulation may not  
29 necessarily be a successful approach to mitigate emissions over a fixed time period. In  
30 addition, we observed increased N<sub>2</sub>O accumulation and emission potential at the end of  
31 incubations concomitant with predicted decreases in carbon availability suggesting that  
32 carbon limitation increases N<sub>2</sub>O emission transiently with the magnitude of emission  
33 dependent on the both chemical and microbiome controls.

34

35

## 36 **Introduction**

37 Nitrous oxide (N<sub>2</sub>O) is a potent greenhouse gas and ozone depleter accounting for around  
38 6.2 percent of worldwide greenhouse gas emissions on a CO<sub>2</sub> mass equivalence basis  
39 (Intergovernmental Panel on Climate Change, 2013). Around 45% percent of this is  
40 anthropogenically produced, mostly (60%) in agricultural settings via soil based N  
41 transformations (Syakila and Kroeze, 2011). Denitrification, the anaerobic microbial  
42 reduction of N compounds (NO<sub>3</sub><sup>-</sup> → NO<sub>2</sub><sup>-</sup> → NO → N<sub>2</sub>O → N<sub>2</sub>), is considered a major pathway  
43 of anthropogenic N<sub>2</sub>O production (Bouwman *et al.*, 2013). Soil conditions (e.g. O<sub>2</sub>  
44 concentration (Zumft, 1997; Smith and Tiedje, 1979; Firestone *et al.*, 1979) and pH (Simek  
45 and Cooper, 2002; Liu *et al.*, 2014; Čuhel and Šimek, 2011)), can affect the ratio of the  
46 major gaseous end products of this process (N<sub>2</sub>O & N<sub>2</sub>) and overall process rates resulting  
47 in higher or lower N<sub>2</sub>O emissions to the atmosphere. Therefore, understanding the soil  
48 factors that favour low N<sub>2</sub>O emission in the presence of available soil N is of great  
49 importance to manipulating agricultural systems towards reduced N<sub>2</sub>O production in the  
50 future.

51 Conceptually, factors affecting soil N<sub>2</sub>O emission potential can be separated into three  
52 areas: distal controls which act in the long term to determine denitrifier microbiome  
53 composition, the genetic and regulatory potential of the microbiome itself, and the  
54 immediate scale impact of proximal controls which may be transduced through the  
55 denitrifiers present (Wallenstein *et al.*, 2006). Proximal factors such as O<sub>2</sub>, pH and  
56 temperature are easily isolated as independent variables, making them ideal experimental  
57 targets. In contrast, microbiome impacts are difficult to isolate due to confounding by soil  
58 chemical and physical factors, likely distal controls. As such, they are more poorly  
59 understood. Studies are often suggestive (Graf *et al.*, 2014) or correlative (Samad *et al.*,  
60 2016; Jones *et al.*, 2014; Philippot *et al.*, 2009; Čuhel *et al.*, 2010; Morales *et al.*, 2010) and  
61 it is often unclear whether microbiome features described are the true driver of an N<sub>2</sub>O  
62 emission outcome. The issue is exacerbated when co-variance is observed with variables  
63 such as pH, which are known to affect both N<sub>2</sub>O/N<sub>2</sub> emission ratios and changes in  
64 microbiome composition (Samad *et al.*, 2016; Philippot *et al.*, 2009).

65 Attempts have been made to control “all” variables relevant to denitrification within soils to  
66 isolate microbiome based effects, however, this may not account for the effect of physical  
67 differences between the soils and certainly doesn’t for unknown and unaccounted variables  
68 impacting denitrification gas kinetics at the time of experimentation (Cavigelli and

69 Robertson, 2000; Holtan-Hartwig *et al.*, 2000). A solution to such problems may be the  
70 extraction of whole microbiomes from soils. Though probably biased in the portion of soil  
71 communities extracted e.g. (Nadeem *et al.*, 2013; Holmsgaard *et al.*, 2011), this method has  
72 demonstrated that communities from different soils or the same soil under different long  
73 term pH treatments will show contrasting N<sub>2</sub>O emission responses to the same pH  
74 conditions (Dörsch *et al.*, 2012; Liu *et al.*, 2014).

75 Despite an increasing focus on microbiome impacts, the relative impact of proximal effects  
76 vs. microbiome composition on N<sub>2</sub>O emission from denitrification is still poorly  
77 understood. In practice, should management of soil to control N<sub>2</sub>O emissions be targeted  
78 towards proximal effects, or is the long term selection of certain denitrifier community  
79 biomes (distal control) more important?

80 Here, we incubated soil extracted cells in chemical extracts from pairs of soils with  
81 contrasting N<sub>2</sub>O/N<sub>2</sub>O+N<sub>2</sub> emission ratios in all potential combinations with the aim of  
82 identifying whether microbiome composition (extracted cell origin) or proximal control  
83 (extracted chemical environment) in general was the most important determinant of the  
84 contrasting N<sub>2</sub>O/N<sub>2</sub>O+N<sub>2</sub> ratios and total N<sub>2</sub>O emission in our model system and soils in  
85 general. We hypothesized chemical differences (especially pH) would be the dominant  
86 effector while microbiome composition effects would weaker but still detectable. Soil cell  
87 extraction allowed treatment of microbial communities as independent transferable units  
88 while extraction of soil chemistry ensured that whatever water-extractable components of  
89 the soil were present (e.g. dissolved carbon) reflected the parent soil in the produced  
90 incubation media. This is in contrast to traditional lab-based analyses which typically use a  
91 single simple carbon source.

92

## 93 **Methods**

### 94 **2.1 Soil sampling**

95 Soils were re-sampled from New Zealand South Island pasture farms (Karangarua,  
96 Makarora, Tapawera, Fairlie-Geraldine, Woodend, Rae's Junction) previously sampled in  
97 Highton et al. (2020). Sampling took place from 21<sup>st</sup> to 23<sup>rd</sup> of March, 2018. Soils were  
98 selected based on contrasting pH and N<sub>2</sub>O hypothetically emitted (%) identified in Highton  
99 et al. (2020). Multiple soil cores (10cm length, 2.5cm diameter) were sampled along a 7.5m  
100 transect evenly at distances of 0, 2.5, 5 and 7.5m using a foot-operated auger until ~3kg of  
101 soil was collected. Repeated cores at each distance were carried out in 4 perpendicular rows  
102 up to 6 cores across. Pooled site cores were stored field moist on ice in partially open  
103 ziplock bags during transport and at 4°C in the lab. Grass, insects, worms and large roots  
104 were removed and cores were sieved at 2mm. Sieved soils were stirred rigorously with a  
105 metal spoon to homogenize. Soils underwent a 36hr period without temperature control  
106 during transport to the Norwegian University of Life Sciences (NMBU, Ås, Akershus,  
107 Norway).

### 108 **2.2 Soil pH**

109 Soil pH was measured using both CaCl<sub>2</sub> (10mM) and ddH<sub>2</sub>O extractants as in Highton et al.  
110 (2020). Values were measured using an Orion 2 star pH meter (ThermoFisher Scientific,  
111 Waltham, Massachusetts, USA) with an Orion Ross Sure Flow Electrode (ThermoFisher  
112 Scientific), allowing up to 5 minutes for readings to stabilize.

### 113 **2.3 Anoxic soil incubations**

114 Anoxic soil incubations were carried out to determine soil denitrification gas kinetics and  
115 N<sub>2</sub>O emission potential. Incubations were prepared as in Highton et al. (2020) excluding  
116 overnight storage and oxic preincubation. Briefly, 3mM NH<sub>4</sub>NO<sub>3</sub> was amended to soils by a  
117 flooding and draining procedure. Twenty grams dry weight equivalent of soil were weighed  
118 into triplicate 120ml serum vials per soil. Vials were crimp sealed with butyl rubber septa  
119 and made anoxic by repeated evacuation and helium flushing,

120 Soil vials were incubated at 20°C in a temperature controlled water bath. Headspace gases  
121 (1ml) were sampled every 4hrs via an automated robotic gas sampling system (Molstad *et*  
122 *al.*, 2007, 2016). Gases (O<sub>2</sub>, CO<sub>2</sub>, NO, N<sub>2</sub>O and N<sub>2</sub>) were quantified in real time using a  
123 coupled Agilent 7890A gas chromatograph (GC) equipped with an ECD, TCD, FID, and

124 chemiluminescence NO<sub>x</sub> analyser (Model 200A, Advanced Pollution Instrumentation, San  
125 Diego, USA). An equal volume of helium is returned to the vials by back pumping ensuring  
126 consistent vial pressure. Dilution of headspace gases is accounted for later through back  
127 calculation. Gas concentrations were calibrated using premixed standard gases supplied by  
128 AGA industrial gases (Oslo, Akershus, Norway). The overall system and its improvements  
129 are described in detail in (Molstad *et al.*, 2007, 2016).

## 130 **2.4 Cell based assay**

131 A soil extracted cell based assay (CBA) was developed to determine the relative  
132 importance of microbiome composition and soil chemistry on N<sub>2</sub>O emission potential (see  
133 emission potential metrics 2.7). Extraction of soil components allowed them to be treated as  
134 independent experimental units. Soil chemistry and cells were extracted separately from  
135 soils with similar native pH and contrasting N<sub>2</sub>O emission potential: Karangarua, a low  
136 N<sub>2</sub>O emitting soil (N<sub>2</sub>O hypo emit ratio = 0.26, pH = 5.75) and Rae's Junction, a high N<sub>2</sub>O  
137 emitting soil (N<sub>2</sub>O hypo emit ratio = 0.92, pH = 5.6). Extracted cells and chemistry were  
138 combined in 4 possible combinations to give the standard treatments: High emitting cells  
139 (HEC) + high emitting extract (HEE), high emitting cells (HEC) + low emitting extract  
140 (LEE), low emitting cells (LEC) + high emitting extract (HEE), low emitting cells (LEC) +  
141 low emitting extract (LEE). Standard treatments were carried out in triplicate vials.  
142 Minimum duplicate 3mM glutamate amended controls of each treatment were produced to  
143 understand the impact of carbon limitation. Duplicate chemical extract free control  
144 incubations containing just extracted cells and milliQ were prepared to test the baseline  
145 activity of extracted cells. Occasional replication in duplicate was necessitated by limited  
146 vial space in the automated incubator/gas sampler. Cell negative controls were prepared to  
147 confirm the sterility of chemical extracts and to quantify the elution of any N<sub>2</sub> and O<sub>2</sub>  
148 remaining in the extract media after He flushing. Full treatment contents and replication is  
149 detailed in Table S1. Hereafter this initial cell based assay is referred to as CBA-int to  
150 differentiate it from the CBA using alternate pH soils (section 2.5)

### 151 **2.4.1 Chemical extract media preparation**

152 Water extractable organic carbon (WEOC) extraction was based on a previous protocol  
153 (Guigue *et al.*, 2014). Air-dried soil was combined with milliQ H<sub>2</sub>O at a 1:3 ratio (170g:  
154 510ml) in 1L Schott bottles. Bottles were shaken lengthways on an orbital shaker at  
155 120rpm for 1hr. Coarse particles were allowed to settle out for 5 minutes and supernatant  
156 was poured into 250ml polycarbonate Nalgene centrifuge tubes (ThermoFisher). Fine

157 particles were removed by successive centrifugation (pelleting) and filtration steps:  
158 centrifugation at 4600G for 20minutes using JXN-26 high-speed centrifuge with JS-7.5  
159 swing out rotor (Beckman Coulter, Brea, California, USA), filtration using 500ml Sterafil  
160 Filter Holders (Merck, Burlington, MA, USA) loaded with 1.2 $\mu$ m glass-fibre pre filters  
161 (Merck) and 0.45 $\mu$ m cellulose filters (Merck), syringe filtration using sterile 0.22 $\mu$ m mixed  
162 cellulose ester filters (Merck). Filter sterilized Na-glutamate solution was added to a  
163 portion of the chemical extract solution from each soil to give a final concentration of 3mM  
164 once diluted in final treatment vials. An equivalent volume of milliQ H<sub>2</sub>O was added to the  
165 rest of the extract to account for dilution. Standard extracts, glutamate amended extracts  
166 and milliQ for carbon free controls were buffered to pH 6 using 20mM Na-phosphate  
167 buffer, as this was the closest value to parent soil pH H<sub>2</sub>O (Rae's Junction= 5.60,  
168 Karangarua = 5.75) within the bufferable range. Extracts and milliQ were re-filtered at  
169 0.22 $\mu$ m to ensure sterility after pH and carbon manipulation. 22.5ml of solution was added  
170 to autoclaved 120ml glass serum vials containing magnetic stir bars. Vials were crimp  
171 sealed with butyl rubber septa + aluminium cap. Anoxia was induced through 8 repeated  
172 cycles of vacuum evacuation and helium filling with continuous magnetic stirring at  
173 360rpm. Vials were stored at 8°C until inoculation and incubation.

#### 174 **2.4.2 Cell extraction by low speed centrifugation**

175 The cell extraction procedure was modified from (Lindahl and Bakken, 1995) with cell  
176 separation on the basis of sedimentation rate using low speed centrifugation. Cell  
177 extractions were performed on the same day they would be used, using optimized  
178 conditions determined in an earlier test extraction yielding approximate cell extraction  
179 efficiencies for each soil. Twenty g of field moist soil was blended with 200ml of milliQ  
180 H<sub>2</sub>O in a two speed Waring blender (Waring, Stamford, Connecticut, USA) on high for  
181 3x1min with 5min intermittent cooling on ice between each blending run. Coarse particles  
182 were allowed to settle for 5min before supernatant was poured off into sterile falcon tubes  
183 up to the 35ml mark (equivalent to 8cm centrifugation distance). Tubes were centrifuged at  
184 1000G for 10minutes with 4°C cooling on a benchtop Mega star 1.6R centrifuge with a TX-  
185 150 swing out rotor (VWR, Radnor, Pennsylvania, US) to sediment out non-cellular debris.  
186 Cell containing supernatant was recovered into additional falcon tubes and centrifuged at  
187 10,000G for 20 minutes with 4°C cooling to pellet cells using an Avanti JXN-30 highspeed  
188 centrifuge with JA 14.50 fixed angle rotor (Beckman Coulter). Supernatant was removed  
189 without disturbing the cell pellet. Cells were washed/resuspended with 40ml milliQ H<sub>2</sub>O,  
190 re-pelleted and supernatant was removed. Cells were re-suspended and pooled to a final

191 stock concentration of  $6.25 \times 10^8$  cells  $\text{ml}^{-1}$  based on predictions from previously performed  
192 cell extraction and cell counts from the same soils.

### 193 **2.4.3 Cell counts**

194 2ml cell extract solution was collected for cell quantification at the time of initial blending  
195 and after washed cell re-suspension in milliQ  $\text{H}_2\text{O}$ . Samples were amended gluteraldehyde  
196 to give a 1.5% fixation solution and stored at  $4^\circ\text{C}$  for at least 2hrs to allow fixation. Cell  
197 counts were carried out using SYBR Green staining and epifluorescence microscopy  
198 (Noble and Fuhrman, 1998). Cell solutions were diluted 200 fold, and 6ml was vacuum  
199 filtered through  $0.2\mu\text{m}$  Anodisc 25 diameter filters (Whatman, Maidstone, UK). SYBR  
200 Green I (Molecular Probes, Eugene, Oregon, Texas) was diluted  $2.5 \times 10^{-3}$  to a working  
201 solution. Filters were placed on a  $100\mu\text{L}$  drop of solution and allowed to stain for 20 min in  
202 the dark. Filters were oven dried at  $60^\circ\text{C}$ . Duplicate filters per sample were prepared. Filters  
203 were mounted onto glass slides with an antifade mounting solution consisting of 50%  
204 glycerol, 50% phosphate buffered saline ( $0.05\text{M Na}_2\text{HPO}_4$ , 0.85% NaCl, pH 7.5) and 0.1 %  
205 p-phenylenediamine. Cells were counted by epifluorescence microscopy.

### 206 **2.4.4 Inoculation and incubation**

207 All vials used during incubations were placed in a  $20^\circ\text{C}$  waterbath to equilibrate. Headspace  
208 overpressure was removed by water filled syringe. All vials were amended with 0.5ml He-  
209 flushed  $\text{NH}_4\text{NO}_3$  solution to give a 3mM final concentration. 2ml helium washed  
210 concentrated cells from the appropriate soil were added to give a total of  $\sim 5 \times 10^7$  cells  $\text{ml}^{-1}$   
211 in each standard, glutamate amended and carbon negative treatment. 2ml of dummy He  
212 flushed milliQ  $\text{H}_2\text{O}$  was added to make up the volume in cell free chemical extract controls.  
213 Vials were magnetically stirred at 360rpm. Headspace gases were sampled and measured  
214 every 4hrs using the robotic autosampler gas chromatographs described above under anoxic  
215 soil incubations (2.3)

### 216 **2.5 Cell based assay with alternate pH soils**

217 The cell based assay experiment was repeated using soils with contrasting pH and  $\text{N}_2\text{O}$   
218 hypothetically emitted ratio to test the impact of cells and chemical extract within the  
219 context of added pH complexity (Here-after referred to as CBA-pH). Rae's Junction was  
220 used as a high  $\text{N}_2\text{O}$  hypo emitting low pH (native pH = 5.60, ratio = 0.92) soil, as in CBA-  
221 int, while Tapawera was used as the higher pH lower high  $\text{N}_2\text{O}$  hypothetically emitted (%)  
222 soil (native pH 6.58, ratio = 0.68). Again, Rae's Junction chemical extracts were buffered



223 to pH 6. Tapawera chemical extracts were buffered closer to the native soil pH at 6.6.  
224 Triplicate standard treatments and their pHs were: HEC + HEE (6), HEC + LEE (6.6), LEC  
225 + HEE (6), LEC + LEE (6.6). Minimum duplicate alternative pH controls were produced  
226 for each treatment in which the pH of the treatment chemical extract media was switched to  
227 the opposite pH. This allowed determination of the independent effects of pH and chemical  
228 extract. Duplicate carbon negative controls and cell negative controls were carried out as in  
229 CBA-int but glutamate amended treatments were not included. Full treatment contents and  
230 replication is detailed in Table S1.

## 231 **2.6 Nitrate and nitrite quantification**

232 Nitrate + nitrite ( $\text{NO}_3^- + \text{NO}_2^-$ ) measurements were performed on soil chemical extracts  
233 before incubation media preparation using a previously described chemiluminescent  
234 detection method ((Braman and Hendrix, 1989; Lim *et al.*, 2018). This allowed accurate  
235 adjustment to a 3mM  $\text{NO}_3^-$  concentration in the cell based assay media. 10 $\mu\text{L}$  of chemical  
236 extract was injected into a sealed glass piping system containing heated (95°C) vanadium  
237 chloride solution (50mM  $\text{VCl}_3$ , 1M HCl).  $\text{VCl}_3$  reacts rapidly with  $\text{NO}_3^-$  and  $\text{NO}_2^-$  at high  
238 temperature to produce NO gas. Produced NO is transported via an  $\text{N}_2$  carrier stream to a  
239 Sievers Nitric Oxide Analyzer 280i system (GE Analytical Instruments, Boulder, CO,  
240 USA). Cell based assay sample  $\text{NO}_2^-$  concentrations during incubations were quantified  
241 using the same chemiluminescence detection system, however, a separate reaction crucible  
242 containing NaI (1% w/v NaI in 50% acetic acid, room temperature) was used to specifically  
243 target  $\text{NO}_2^-$ . Signal peak areas were calibrated using 10 $\mu\text{L}$  injections of a 10-fold  $\text{KNO}_3$  or  
244  $\text{KNO}_2$  dilution series (1mM to 0.001mM). A single rep from each CBA treatment was  
245 sampled every ~24hrs (0.15ml) for immediate quantification of accumulated  $\text{NO}_2^-$ .

## 246 **2.7 $\text{N}_2\text{O}$ emission potential**

247 Soil and CBA treatment  $\text{N}_2\text{O}$  emission potential was evaluated based on two time-  
248 integrated measures:  $\text{N}_2\text{O}$  hypothetically emitted (from here on referred to as  $\text{N}_2\text{O}$  emitted)  
249 and  $\text{N}_2\text{O}$  hypothetically emitted ratio (from here on referred to as  $\text{N}_2\text{O}$  ratio). Both  
250 measures were developed to account for periods of net  $\text{N}_2\text{O}$  reconsumption from vial  
251 headspace which would not occur in an open system and is therefore not indicative of  $\text{N}_2\text{O}$   
252 emission potential.  $\text{N}_2\text{O}$  hypothetically emitted is calculated as the sum of net positive  $\text{N}_2\text{O}$   
253 accumulations between each sampling point over the course of the incubation +  $\text{N}_2\text{O}$  lost  
254 due to sampling dilution.  $\text{N}_2\text{O}$  hypothetically emitted ratios are calculated as  $\text{N}_2\text{O}$

255 hypothetically emitted/(N<sub>2</sub>O hypothetically emitted + N<sub>2</sub>O emission prevented) where the  
256 N<sub>2</sub>O emissions prevented term is the total N<sub>2</sub> finally accumulated in the vial + losses to  
257 sampling and leaks - N<sub>2</sub> derived from reduction of headspace accumulated N<sub>2</sub>O. This  
258 formula can also be applied to soil incubations which include only a single N<sub>2</sub>O  
259 accumulation peak and the resulting value is almost equivalent to the N<sub>2</sub>O hypothetically  
260 emitted (%) term previously utilized in Highton et al. (2020), differing only in use of  
261 cumulative N<sub>2</sub>O (zeroed, sampling dilution and leakage accounted for) in calculations  
262 rather than the previously used actual in vial quantities.

263 Differences in these measures of N<sub>2</sub>O emission potential between treatments were  
264 evaluated based on non-overlapping 95% confidence intervals. Independent variable (cell  
265 origin, chemical extract origin, pH) effects on N<sub>2</sub>O emitted or ratio were calculated by  
266 comparison of relevant treatments and with a specific predicted direction of effect in mind.  
267 LE cells, chemical extracts and higher pH (6.6) were expected to decrease N<sub>2</sub>O emitted and  
268 ratios while HE cells, chemical extracts and lower pH (6.0) were expected to increase N<sub>2</sub>O  
269 emitted and ratios. Expected directions of effect were denoted with a positive value and  
270 unexpected with a negative value. When averaged, effects were maintained as positive or  
271 negative values unless stated that the effect size given was directionless.

## 272 **2.8 Microbiome composition**

273 DNA was extracted from cell stock and parent soil for each soil to determine extraction  
274 bias and community differences between separate cell extracts. For soils, parent soil was  
275 collected at the start of the cell extraction protocol and stored at -80°C until DNA extraction  
276 of duplicate 0.25g replicates using the DNeasy powerlyzer powersoil extraction kit (Qiagen,  
277 Hilden, Germany). Duplicate 5ml cell stock aliquots were harvested just prior to  
278 inoculation of cell based assay treatments and frozen at -80°C until cell pelleting and DNA  
279 extraction.

280 16S amplicon sequencing of samples was carried out on illumina hiseq using Version 4\_13  
281 of the Earth Microbiome Project standard protocol (Caporaso *et al.*, 2012). Sequences are  
282 available in the NCBI Sequence Read Archive under the BioProject ID PRJNA678002.  
283 Sequence quality control and ASV (Amplicon sequence variant) picking was carried out in  
284 R version 3.6.1 (R Core Team, 2016) using the dada2 pipeline version 1.12.1 (Callahan *et*  
285 *al.*, 2016) . Taxonomy was assigned using the SILVA database (version 132) (Quast *et al.*,  
286 2013) and the RDP (Ribosomal Database Project) bayesian classifier (Wang *et al.*, 2007).

287 Sample sequence reads were rarefied 10 times to a depth of 11500 sequences using  
288 phyloseq package functions (McMurdie and Holmes, 2013). Independent rarefactions were  
289 combined and normalised to the number of rarefactions. Fractional ASV counts were  
290 rounded to integers.

### 291 **2.8.1 Beta diversity and ASV sharing**

292

293 All beta diversity and ASV sharing plots were generated using ggplot2 version 3.2.1  
294 (Ginestet, 2011) and adjusted with the ggpubr (Kassambara, 2020) and forcats (Wickham,  
295 2020) packages unless otherwise stated. The phyloseq package (McMurdie and Holmes,  
296 2013) was used to calculate and display community composition dissimilarity, the mean  
297 number of shared and unique ASVs, and the relative abundance of organisms at the phylum  
298 rank with the additional usage of the dplyr (Wickham *et al.*, 2019) and Rmisc (Hope, 2013)  
299 packages. Community composition dissimilarity patterns were confirmed using vegan  
300 package (Dixon, 2003) ANOSIM and ADONIS tests.

301

302 The fold change of ASV abundance differences between extracted cells and soil samples,  
303 and its accompanying p-value was generated with the use of the edgeR (Robinson *et al.*,  
304 2009) package to identify significantly changing ASVs with an exact test. P-values were  
305 adjusted based on Benjamini-Hochberg p value correction and ASVs were only displayed if  
306 their false discover rate (FDR) was below 0.1. ASV Genus taxonomy was only labelled if  
307 abundance differed more than 5-fold with a p-value  $< 1 \times 10^{-4}$ .

308

309

## 310 **Results**

### 311 **3.1 Soil and cell based incubations have distinct gas accumulation patterns** 312 **but relative emission potential is conserved**

313 Denitrification gas (NO, N<sub>2</sub>O, N<sub>2</sub>) kinetics were compared between soil and cell based  
314 incubations to determine whether the cell based system accurately modeled the trends  
315 observed using soils. Soil incubations (Figure 1A, Figure S1) displayed a single N<sub>2</sub>O  
316 accumulation and depletion curve. N<sub>2</sub>O ratios were determined by the sequentiality of N<sub>2</sub>O  
317 production and reduction steps as previously described in Highton et al. (2020). In the most  
318 extreme cases, close to all added N was accumulated as N<sub>2</sub>O before high rate N<sub>2</sub>  
319 production/N<sub>2</sub>O reduction was initiated, predicting high emissions from an in situ  
320 (unsealed) environment.

321 Gas accumulation patterns in cell-based incubations were inconsistent with soil incubations.  
322 Most treatments experienced an initial lag phase in denitrification product accumulation  
323 and CO<sub>2</sub> accumulation (Figure S2). Only +glutamate treatments completed processing of  
324 added N (Figure S3B) during the experimental timeframe. Early N<sub>2</sub>O accumulation was  
325 very low while major differences in N<sub>2</sub>O accumulation, and thus N<sub>2</sub>O ratio, occurred later  
326 in the incubation when total N turnover rates and N<sub>2</sub>O reduction (N<sub>2</sub> production) rates  
327 suddenly dropped (Figure S3, Figure S4). Late drops in N<sub>2</sub>O reduction rate were usually  
328 greater than drops in N<sub>2</sub>O production rates, resulting in increased N<sub>2</sub>O accumulation.

329 Despite distinct gas accumulation patterns, soil and cell based assays sustained relative  
330 rankings based on N<sub>2</sub>O ratios (Figure 2, Rae's Junction>Tapawera>Karangarua). Gas  
331 production profiles were not completely consistent between separate cell based assay runs  
332 as evidenced by the repeated Rae's Junction based incubations (Figure 1, Rae's Junction vs.  
333 2-Rae's Junction), however, this variation did not greatly impact N<sub>2</sub>O ratios and relative  
334 ranking of incubations (Figure 2).

### 335 **3.2 Both chemistry and microbiome determine N<sub>2</sub>O emission potential**

336 We compared N<sub>2</sub>O ratios and N<sub>2</sub>O accumulation in a CBA (CBA-int) seeded with cells and  
337 chemical extracts from soils with similar native pH (5.6, 5.75) to determine whether  
338 microbiome (cells) or chemical factors (extracts) were the most important determinant of  
339 N<sub>2</sub>O emission potential in the absence of pH effects. Both cell and chemical extract origin  
340 affected N<sub>2</sub>O ratio and N<sub>2</sub>O emitted resulting in a gradient: HEC+HEE>

341 LEC+HEE≈HEC+LEE>LEC+LEE (Figure 3A, B). Cell and chemical extract origin had  
342 similar impacts on N<sub>2</sub>O ratio but chemical extract origin was the most important  
343 determinant of overall emissions, with on average 60% greater impact (Table 1, CBA-int).

344 To account for the role of pH, soils with differing N<sub>2</sub>O ratio and pH were also compared  
345 (CBA-pH). pH of the treatment was coupled to the soil chemical extract (HE extracts: 6.0,  
346 LE extracts: 6.6). Again, both cell and chemical extract origin (including coupled pH)  
347 affected N<sub>2</sub>O ratio and N<sub>2</sub>O emitted resulting in a gradient:

348 LEC+HEE>HEC+HEE>HEC+LEE>LEC+LEE (Figure 3C, D) but chemical extract was  
349 the most important determinant of both N<sub>2</sub>O ratio and emissions (Table 1, CBA-pH).

350 Patterns were largely determined by the unexpected emission patterns of LE cells which  
351 had very high emission potential in the presence of HE extracts yet low emission potential  
352 in the presence of LE extracts. **Negative** emission potential difference values (Table 1,  
353 CBA-pH) indicate the unexpected **increase** in emission potential using LE cells in the  
354 presence of HE extract.

### 355 **3.3 pH has an outsized impact on low emitting cells**

356 pH switched control treatments (HEE 6.0→6.6, LEE 6.6→6.0) revealed high N<sub>2</sub>O ratio in  
357 the LEC+HEE treatment was largely a response to the low pH of the HE extracts; LE cell  
358 N<sub>2</sub>O ratios were much more sensitive to independent pH change than HE cells (Table 2).

359 We accounted for these strong impacts on LE cells by examination of the overall assay at  
360 pH 6.6, revealing a similar trend to the CBA-int assay: equal impact of cell and chemical  
361 extract origin on ratio (average change of 0.13 points), greater impact of chemical extract  
362 on total N<sub>2</sub>O emissions (average change cell= 0.37μmol-N, chemical extract=4.19, Table  
363 S2, overall). However, it should be noted that independent impact of HE extracts still lead  
364 to unexpectedly high absolute N<sub>2</sub>O emissions from the LE+HE treatment at pH 6.6 due to  
365 rate effects of the from the HE extract (Table S2, overall).

366 Comparison of independent pH, and chemical extract origin effects revealed an additional  
367 two notable pH related phenomena:

- 368 1) Low pH drove large increases in N<sub>2</sub>O ratio (average change 0.11 points), on par  
369 with independent chemical extract effects (Figure 4A), yet only minor changes in  
370 total N<sub>2</sub>O emissions (average 1.30 μmol-N, Figure 4B) due to the contrasting  
371 impact of pH on N turnover rates and N<sub>2</sub>O ratios. In one instance pH increase to 6.6  
372 actually increased total emissions (Table 2, 6 HEC + HEE).
- 373 2) Low pH and HE extract acted synergistically to increase LE cell emission potential  
374 i.e. Switching pH and chemical extract of 6.6 LEC + LEE treatment to 6 and HE  
375 extracts lead to a greater increase in N<sub>2</sub>O ratio and N<sub>2</sub>O emitted than would be  
376 predicted by independent changes in pH or extract alone (Table 2). A much weaker  
377 positive synergistic effect (reduction in N<sub>2</sub>O ratio and total N<sub>2</sub>O) of LE extracts and  
378 LE pH (higher-6.6) on HE cells was also indicated (Table 2).

### 379 **3.4 Carbon/starvation effect**

380 We hypothesized that sudden changes in N turnover (especially N<sub>2</sub> production) and  
381 emissions during the cell based incubations were linked to shifts in carbon availability. +C  
382 (3mM Na-glutamate) controls were included for each swap treatment in CBA-int to  
383 determine whether any of the observed differences in treatments were caused by changes in  
384 C availability. Divergence of gas accumulation rates in +C controls compared with standard  
385 treatments indicated that all treatments became carbon limited during the course of the  
386 incubation (Figure 5). Further, carbon amended controls did not experience the late  
387 incubation decreases in N<sub>2</sub> production rate, or the associated increased N<sub>2</sub>O accumulation,  
388 seen in -C treatments suggesting these features may result from C limitation. Predicted  
389 actual total N gas and CO<sub>2</sub> production rates typically dropped during the transition to the  
390 lower N<sub>2</sub> rate period also supporting increasing C limitation (Figure S2). CO<sub>2</sub> rate drops  
391 during this time period were often definitive and of high magnitude but were less obvious  
392 for some incubations: HEC + LEE, 6 HEC + HEE, 6.6 LEC + LEE. We carried out a  
393 further analysis separating the impact of cell and chemical extracts during the carbon non-  
394 limited and limited periods of the incubation (Supplemental document S1, Figure S5)

### 395 **3.5 Microbiome analysis**

396 To assess if extracted cells were representative of soil microbiomes, and to compare  
397 differences in microbiomes across soils we used 16S rRNA amplicon sequencing and

398 processed results into amplicon sequence variants (ASVs). Microbiome differences were  
399 primarily associated to soil origin (ANOSIM:  $R^2 = 0.72$ ,  $p < 0.001$ , Figure 6A) with  
400 extracted cells clustering alongside their original soils. However, small but significant  
401 changes were detected between extracted cells and soils (ANOSIM:  $R^2 = 0.34$ ,  
402  $p = 0.003$ ). While both extracted cells and soils shared a large proportion (mean 50 %  
403 with a standard deviation of 12 %) of their total ASVs (Figure 6B), extracted cells  
404 consistently recovered a larger number of ASVs (Wilcox,  $W = 16$ ,  $p = 0.029$ ). This bias in  
405 ASV detection was reflected at the phylum level (Figure 6C) where Firmicutes were more  
406 represented in the soils compared to extract. It also highlighted differences between soils.  
407 To identify specific organisms enriched in either soils or extracted cells ASVs with  
408 differential abundance between sample type were detected using an exact test (Figure 6D).  
409 ASV's in the Bacillaceae family were significantly enriched in all soils relative to extracted  
410 cells but otherwise no consistent extraction bias was observable.

411

## 412 **Discussion**

### 413 **4.1 Relevance of model to soils**

414 The cell based assay approach allowed causal linkage of microbiome composition and  
415 chemistry to N<sub>2</sub>O emission potential. However, as with any model system, applicability to  
416 the initial environment studied must be present. Conserved soil rankings based on N<sub>2</sub>O  
417 ratios implied general relevance of the system to soils (Figure 2), however, a number of  
418 kinetic dissimilarities from soils resulted in different absolute N<sub>2</sub>O ratios, which must be  
419 considered.

- 420 1) An initial lag phase in which cell based assay incubations accumulated only very  
421 low concentrations of CO<sub>2</sub> and denitrification products NO<sub>2</sub><sup>-</sup>, NO, N<sub>2</sub>O, N<sub>2</sub> (Figure  
422 S3, Figure S4). This could hypothetically be caused by an initial lack of sufficient  
423 denitrifier cell density or a stress response to the cell extraction procedure. Lag or at  
424 least very low early denitrification activity and CO<sub>2</sub> production is also observable in  
425 some previous soil-extracted cell based experiments, though the cause is unclear  
426 (Nadeem *et al.*, 2013; Brenzinger *et al.*, 2015; Dörsch *et al.*, 2012).
- 427 2) Low N<sub>2</sub>O accumulation during the early incubation period (Figure S3, Figure S4).  
428 This occurred in most CBA treatments, notably excluding those containing  
429 Tapawera cells, and resulted in lowered N<sub>2</sub>O ratios relative to parent soils. Low  
430 N<sub>2</sub>O accumulation could be a feature of extracted cell based incubations in the  
431 presence of easily utilizable carbon as indicated by very low N<sub>2</sub>O accumulation in  
432 the present carbon amended cell based assay treatments (Figure S3B) and a number  
433 of previous extracted cell based studies (Dörsch *et al.*, 2012; Brenzinger *et al.*,  
434 2015).
- 435 3) A secondary period of high N<sub>2</sub>O accumulation/reduced N<sub>2</sub> production rates in cell  
436 based incubations. Evidence discussed below (4.4) suggests this was most likely a  
437 result of carbon limitation and utilization of less energetically favourable carbon  
438 sources.

439 In addition to the explanations given above, the kinetic dissimilarities between soils and  
440 cell based incubations are potentially explained by a variety of differences in experimental  
441 conditions. Soil and cell incubations most likely differed in cell density and numbers,  
442 microbiome composition (due to any biases inherent in the extraction procedure  
443 (Holmsgaard *et al.*, 2011; Nadeem *et al.*, 2013)), carbon availability and type (the soluble



444 water extractable component of soil C is usually only around 1% of total soil C and no  
445 attempt was made to match carbon concentration in incubations to soils (Gregorich *et al.*,  
446 2003; Guigue *et al.*, 2014)), time of soil in storage (due differences in when separate  
447 incubation experiments were carried out), and notably, physical differences including,  
448 presence/absence of soil particles, water content and stirring. Water can slow gas diffusion  
449 by 4 orders of magnitude (Heincke and Kaupenjohann, 1999), initially leading to gas  
450 retention (Clough *et al.*, 2005) while soil heterogeneity might limit or enhance local carbon  
451 availability (Parkin, 1987; Kuzyakov and Blagodatskaya, 2015).

452 Relevance to the soils is further dependent on extracted microbiomes accurately  
453 representing soil microbiomes. During any soil cell extraction method, only a portion of  
454 soil cells are extracted (Lindahl and Bakken, 1995) leaving the possibility for biases in  
455 composition of the community extracted. For example, Nycodenz based extractions have  
456 previously been shown to result in reduced microbiome diversity and bias towards or  
457 against certain bacterial phyla compared to parent soils (Holmsgaard *et al.*, 2011). Different  
458 dispersal methods may also recover metabolically distinct communities (strongly attached  
459 vs. loosely attached cells) with different N<sub>2</sub>O emission potentials (Nadeem *et al.*, 2013).

460 Our own investigations revealed high similarity between parent soil and extracted cell  
461 microbiomes at a DNA level (Figure 6A). Unfortunately, we are unable to completely  
462 confirm this DNA represented viable cells rather than dead or free floating DNA which  
463 passed through the cell extraction procedure. Further, our investigations consistently  
464 identified a high number of unique ASVs in extracted cells and total observed richness  
465 above that captured from soils. The reason for this is unlikely to be resolved without further  
466 empirical evidence but could be due to the larger soil pool and concentration steps used for  
467 cell extraction vs. direct soil DNA extractions, movement of species out of rare biosphere  
468 in response to the cell extraction protocol disturbance, removal of DNA sorbing soil  
469 particles which otherwise inhibit recovery of DNA during extraction (Paulin *et al.*, 2013),  
470 dilution of soil pcr/sequencing inhibitors, or increased relative abundance of rarer species  
471 due to destruction of abundant organisms during cell extraction. Irrespective of the above  
472 limitations, the extracted microbiomes from separate soils will with certainty represent  
473 distinct microbiomes from one another, while the conserved relative ranking of N<sub>2</sub>O hypo  
474 emit ratios between soil and cell based assays indicate representivity at a functional level  
475 (Figure 2).

## 476 **4.2 Proximal vs. microbiome effects**

477 Cell origin impacted both N<sub>2</sub>O ratio and emissions (Table 1), indicating a strong role for  
478 microbiome composition in mediating N<sub>2</sub>O emission potential. Previous extracted cell  
479 based studies support this claim (Dörsch *et al.*, 2012; Nadeem *et al.*, 2013; Liu *et al.*, 2014)  
480 but have typically focused on understanding soil community responses to pH and provide  
481 little evaluation of overall impact of community differences compared to other chemical  
482 controls. In contrast, another soil based study previously found minimal impact of distal  
483 control (implied microbiome composition) on N<sub>2</sub>O ratio but significant impact on total  
484 emissions (rate/ enzyme activity) (Čuhel and Šimek, 2011). Here, the directionless effect  
485 size of cell origin effects on N<sub>2</sub>O ratio and emissions across both CBAs were not minor, on  
486 average only 22 and 37% lower than chemical effects. Therefore, microbiome composition  
487 should be considered an important determinant of N<sub>2</sub>O emission potential.

488 Directional analyses (i.e. LE cells and chemical extracts are expected to decrease N<sub>2</sub>O  
489 emission potential and HE cells/extracts vice versa) supported the notion that specific  
490 microbiomes and chemical backgrounds can be predictably generalized as lower or higher  
491 emitting. In the absence of pH effects (CBA-int or CBA-pH at pH 6.6) LE cells and  
492 chemical extracts predictably lowered total emissions and ratios while HE cells and  
493 chemical extracts increased them (Table 1, Table S2). Excepting a single case in which HE  
494 extracts increased total emissions due to an increased N turnover rate (Table S2, LE cells +  
495 HE extract). Such communities or chemical backgrounds might hypothetically be selected  
496 for in farms soils to reduce N<sub>2</sub>O emissions. Generalizations might also be applied about the  
497 relative importance of microbiome and chemical backgrounds. In the absence of pH effects  
498 (CBA-int or CBA-pH at pH 6.6) cell and chemical extracts had a similar average impact on  
499 N<sub>2</sub>O ratios but chemical extracts had a greater impact on total emissions due to rate effects  
500 (Table 1, Table S2).

501 Contrastingly, our assays also supported specific less predictable interactions between  
502 certain cells, chemical backgrounds and pH that broke the above generalizations. Tapawera  
503 LE cells were particularly sensitive to lower pH (Table 2) and especially so in the HE  
504 chemical background, showing the highest ratios and total emissions of any treatment  
505 (Table 1jhjom CBA-pH). Our ultimate interpretation is that some generalisations can be  
506 made about what is a “good” (low N<sub>2</sub>O emitting) denitrifying community and chemical  
507 background but that unpredictable specific effects may occur, especially when cells are  
508 denitrifying below their typical pH .

509 An important caveat of all the above interpretations is our inability to completely confirm  
510 that cell origin effects were only the result of community composition effects. Extracted  
511 cells clearly displayed some lesser but notable activity when incubated in just H<sub>2</sub>O (Figure  
512 S3C, Figure S4C) indicating some carbon pool associated with the cells (lysed cells,  
513 adherent carbon, stored carbon). Differences in this carbon availability between different  
514 cell extractions could potentially influence the denitrification kinetics within the main  
515 treatments, especially rates. Cell + H<sub>2</sub>O controls demonstrate similar gas accumulation rates  
516 across both cell types in CBA-int (Figure S3C) indicating that, most likely, cell associated  
517 carbon should have little observable impact on treatment differences. However, this cannot  
518 be claimed for CBA-pH where gas accumulation rates were clearly lower in HE cell + H<sub>2</sub>O  
519 controls (Figure S4C).

### 520 **4.3 pH effects**

521 pH differences of just 0.6 points could account for similar changes in N<sub>2</sub>O ratio as  
522 differences in chemical extract during CBA-pH (Figure 4A). This is consistent with  
523 denitrification literature which commonly identifies pH as a major driving factor of  
524 differences in N<sub>2</sub>O/N<sub>2</sub> emission ratios between soils (Simek and Cooper, 2002; Čuhel and  
525 Šimek, 2011; Liu *et al.*, 2014). In contrast, N<sub>2</sub>O emissions were much less susceptible to  
526 pH change compared with chemical extract origin due to the conflicting effects of pH on  
527 N<sub>2</sub>O ratio and denitrification rates, which are also previously noted (Šimek *et al.*, 2002). In  
528 one case, lowering the pH actually resulted in increased N<sub>2</sub>O emissions, therefore, this  
529 evidence supports the view that pH manipulation of soil is not necessarily a successful  
530 approach to reduce overall N<sub>2</sub>O emissions over a fixed time period. Further, we noted the  
531 unideal scenario in which decreasing the pH experienced by higher pH adapted cells had a  
532 significant negative impact on N<sub>2</sub>O ratio, while increasing the pH experienced by lower pH  
533 adapted cells had only a minor positive impact on N<sub>2</sub>O ratio. In essence, it may be easier  
534 for pH change to cause detrimental effects than repair them. Although our pH system may  
535 be not be ideal to test this effect. Due to the buffer system used, the low pH soil was  
536 already above its natural pH under the low pH treatment.

### 537 **4.4 Differential stages in N<sub>2</sub>O production: the role of carbon**

538 The timing of sudden decreases in CO<sub>2</sub> production and overall denitrification rates (Figure  
539 S2), combined with the lack of late N<sub>2</sub>O accumulation from glutamate amended controls  
540 (Figure 5) suggest carbon limitation caused the increased N<sub>2</sub>O accumulation and reduced

541 N<sub>2</sub> rate observed in the later period of the cell based incubations. If simple carbon limitation  
542 was occurring, it is expected that drops in CO<sub>2</sub> production and denitrification rates would  
543 wane gradually over time as carbon concentrations reduced, however, the drops in CO<sub>2</sub> and  
544 denitrification rates were often well defined and rapid. Therefore, we suggest the sudden  
545 transitions in rates are the result of exhaustion of a more labile carbon pool and initiation,  
546 or maintenance, of consumption of a more recalcitrant carbon pool. Soil extracted carbon is  
547 typically quantified in these two separate pools with separate consumption rate constants  
548 assigned to the consumption of each pool e.g. (Bowen *et al.*, 2009; Guigue *et al.*, 2014;  
549 Kalbitz *et al.*, 2003). The multiple (greater than two) N<sub>2</sub> rate switches observable in some  
550 incubations (Figure S3A, LEC + HEE, Figure S6, 6 LEC + LEE extended) suggest effects  
551 to denitrification rates could be through greater than two distinct carbon pools of  
552 consecutively reduced energy availability.

553 Alternatively, denitrification rates may be sustained by consumption of energy storage  
554 molecules during the reduced N<sub>2</sub> rate period. Increased N<sub>2</sub>O accumulation was previously  
555 shown in monocultures of *Alcaligenes faecalis* during carbon limitation and co-occurred  
556 with consumption of energy storage molecules (Schalk-Otte *et al.*, 2000). This was  
557 attributed to competition for limited electrons between N<sub>2</sub>O reductase and the previous  
558 denitrification reductases. Under this mechanism, differing N-reductase electron carrier  
559 affinities or regulatory mechanisms create an uneven distribution of electrons to the  
560 separate denitrification steps (Pan *et al.*, 2013; Ribera-Guardia *et al.*, 2014; Wang *et al.*,  
561 2018; Schalk-Otte *et al.*, 2000). Earlier N-reductases are thought to outcompete N<sub>2</sub>O  
562 reductase resulting in N<sub>2</sub>O accumulation during limited electron supply. Electron supply  
563 can be limited due to substrate availability but also carbon oxidation rates (Pan *et al.*, 2013)  
564 which depend on the substrate being utilized (Ribera-Guardia *et al.*, 2014) and presumably  
565 the organism carrying out the oxidation.

566 Electron competition is consistent with concurrent drops in CO<sub>2</sub> production, N turnover  
567 rates and uneven rebalancing of N<sub>2</sub>O production/reduction in the present study, whether  
568 this is during consumption of energy storage molecules or more recalcitrant carbon.  
569 However, it is unclear how this mechanism should proceed in a complex community of  
570 denitrifiers as competition for electrons is only hypothetically viable when N<sub>2</sub>O production  
571 and reduction proceed within the same organism. This is not necessarily a valid assumption  
572 in a complex denitrifying community where multiple species of denitrifiers could specialize  
573 in separate steps of the process due to the modularity of denitrification genes (Graf *et al.*,

574 2014; Roco *et al.*, 2017; Lycus *et al.*, 2017). Electron competition between N-reductases  
575 has been tested in complex communities (Pan *et al.*, 2013; Ribera-Guardia *et al.*, 2014;  
576 Wang *et al.*, 2018) and in some cases it was assumed that denitrification was carried out by  
577 complete denitrifiers based on the genera of the dominant microbes within the culture (Pan  
578 *et al.*, 2013; Wang *et al.*, 2018). In depth sequencing of metagenomes and  
579 metatranscriptomes with genome reconstruction would be necessary to actually resolve the  
580 modularity of active denitrifiers within the present system since phylogeny is usually  
581 considered a poor predictor of denitrification genetic potential (Jones *et al.*, 2008).

582 A point of confusion, possibly contradicting the above interpretations, is that cell + H<sub>2</sub>O  
583 treatments also demonstrated the distinct denitrification rate changes which we have  
584 attributed to carbon limitation (Figure S3C, Figure S4C). This either means the carbon  
585 limitation hypothesis and associated interpretations are wrong or that these incubations  
586 begun with a non or initially less limiting availability of carbon. Cells were washed  
587 multiple times during extraction to remove carbon from the suspension solution. It is  
588 therefore most likely that the utilized carbon sources in these treatments is derived from  
589 lysed cellular constituents, cell adherent carbon, insoluble carbon or stored carbon.

#### 590 **4.5 Conclusion**

591 These investigations provide causal evidence for microbiome composition effects on N<sub>2</sub>O  
592 emission potential, but these were on average still weaker than chemical effects.  
593 Differences in cell based assay gas accumulation kinetics reduce the general applicability of  
594 this system to soils but also serendipitously provide evidence that carbon limitation or  
595 switching to more recalcitrant carbon sources can lead to increased N<sub>2</sub>O emissions.  
596 Investigations into the effects of pH corroborate the large body of research suggesting that  
597 this is a particularly important determinant of soil N<sub>2</sub>O emission ratios but also suggest that  
598 its impact on total N<sub>2</sub>O emissions over a fixed time period could be minor compared to  
599 other soil variables. Ultimately, we add to the mounting evidence that microbiome  
600 composition needs to be considered during soil manipulations aimed at reducing N<sub>2</sub>O  
601 emissions.

602

- 603 Bouwman AF, Beusen AHW, Griffioen J, Van Groenigen JW, Hefting MM, Oenema O, *et*  
604 *al.* (2013). Global trends and uncertainties in terrestrial denitrification and N<sub>2</sub>O emissions.  
605 *Philos Trans R Soc B Biol Sci* **368**: 20130112.
- 606 Bowen SR, Gregorich EG, Hopkins DW. (2009). Biochemical properties and  
607 biodegradation of dissolved organic matter from soils. *Biol Fertil Soils* **45**: 733–742.
- 608 Braman RS, Hendrix SA. (1989). Nanogram nitrite and nitrate determination in  
609 environmental and biological materials by vanadium (III) reduction with  
610 chemiluminescence detection. *Anal Chem* **61**: 2715–2718.
- 611 Brenzinger K, Dörsch P, Braker G. (2015). pH-driven shifts in overall and transcriptionally  
612 active denitrifiers control gaseous product stoichiometry in growth experiments with  
613 extracted bacteria from soil. *Front Microbiol* **6**: 961.
- 614 Burford JR, Bremner JM. (1975). Relationships between the denitrification capacities of  
615 soils and total, water-soluble and readily decomposable soil organic matter. *Soil Biol*  
616 *Biochem* **7**: 389–394.
- 617 Callahan BJ, McMurdie PJ, Rosen MJ, Han AW, Johnson AJA, Holmes SP. (2016).  
618 DADA2: High-resolution sample inference from Illumina amplicon data. *Nat Methods* **13**:  
619 581–583.
- 620 Caporaso JG, Lauber CL, Walters WA, Berg-Lyons D, Huntley J, Fierer N, *et al.* (2012).  
621 Ultra-high-throughput microbial community analysis on the Illumina HiSeq and MiSeq  
622 platforms. *ISME J* **6**: 1621–1624.
- 623 Cavigelli MA, Robertson GP. (2000). The Functional Significance of Denitrifier  
624 Community Composition in a Terrestrial Ecosystem. *Ecology* **81**: 1402–1414.
- 625 Clough TJ, Sherlock RR, Rolston DE. (2005). A Review of the Movement and Fate of N<sub>2</sub>O  
626 in the Subsoil. *Nutr Cycl Agroecosystems* **72**: 3–11.
- 627 Čuhel J, Šimek M. (2011). Proximal and distal control by pH of denitrification rate in a  
628 pasture soil. *Agric Ecosyst Environ* **141**: 230–233.
- 629 Čuhel J, Šimek M, Laughlin RJ, Bru D, Chèneby D, Watson CJ, *et al.* (2010). Insights into  
630 the effect of soil pH on N<sub>2</sub>O and N<sub>2</sub> emissions and denitrifier community size and activity.  
631 *Appl Environ Microbiol* **76**: 1870–1878.

- 632 Dixon P. (2003). VEGAN, a package of R functions for community ecology. *J Veg Sci* **14**:  
633 927–930.
- 634 Dörsch P, Braker G, Bakken LR. (2012). Community-specific pH response of  
635 denitrification: experiments with cells extracted from organic soils. *FEMS Microbiol Ecol*  
636 **79**: 530–541.
- 637 Firestone MK, Smith MS, Firestone RB, Tiedje JM. (1979). The influence of nitrate, nitrite,  
638 and oxygen on the composition of the gaseous products of denitrification in soil. *Soil Sci*  
639 *Soc Am J* **43**: 1140.
- 640 Ginestet C. (2011). ggplot2: Elegant Graphics for Data Analysis. *J R Stat Soc Ser A*  
641 (*Statistics Soc* **174**: 245–246.
- 642 Graf DRH, Jones CM, Hallin S. (2014). Intergenomic comparisons highlight modularity of  
643 the denitrification pathway and underpin the importance of community structure for N<sub>2</sub>O  
644 emissions De Crécy-Lagard V (ed). *PLoS One* **9**: e114118.
- 645 Gregorich E., Beare M., Stoklas U, St-Georges P. (2003). Biodegradability of soluble  
646 organic matter in maize-cropped soils. *Geoderma* **113**: 237–252.
- 647 Guigue J, Mathieu O, Lévêque J, Mounier S, Laffont R, Maron PA, *et al.* (2014). A  
648 comparison of extraction procedures for water-extractable organic matter in soils. *Eur J*  
649 *Soil Sci* **65**: 520–530.
- 650 Heincke M, Kaupenjohann M. (1999). Effects of soil solution on the dynamics of N<sub>2</sub>O  
651 emissions: A review. *Nutr Cycl Agroecosystems* **55**: 133–157.
- 652 Highton MP, Bakken LR, Dörsch P, Wakelin S, de Klein CAM, Molstad L, *et al.* (2020).  
653 Soil N<sub>2</sub>O emission potential falls along a denitrification phenotype gradient linked to  
654 differences in microbiome, rainfall and carbon availability. *Soil Biol Biochem* **150**: 108004.
- 655 Holmsgaard PN, Norman A, Hede SC, Poulsen PHB, Al-Soud WA, Hansen LH, *et al.*  
656 (2011). Bias in bacterial diversity as a result of Nycodenz extraction from bulk soil. *Soil*  
657 *Biol Biochem* **43**: 2152–2159.
- 658 Holtan-Hartwig L, Dörsch P, Bakken LR. (2000). Comparison of denitrifying communities  
659 in organic soils: Kinetics of NO<sub>3</sub><sup>-</sup> and N<sub>2</sub>O reduction. *Soil Biol Biochem* **32**: 833–843.

- 660 Hope RM. (2013). Rmisc: Ryan Miscellaneous R package version 1.5. [https://cran.r-](https://cran.r-project.org/package=Rmisc)  
661 [project.org/package=Rmisc](https://cran.r-project.org/package=Rmisc).
- 662 Intergovernmental Panel on Climate Change. (2013). Climate change 2013 the physical  
663 science basis: Working Group I contribution to the fifth assessment report of the  
664 intergovernmental panel on climate change. Cambridge University Press: Cambridge.
- 665 Jones CM, Spor A, Brennan FP, Breuil M-C, Bru D, Lemanceau P, *et al.* (2014). Recently  
666 identified microbial guild mediates soil N<sub>2</sub>O sink capacity. *Nat Clim Chang* **4**: 801–805.
- 667 Jones CM, Stres B, Rosenquist M, Hallin S. (2008). Phylogenetic analysis of nitrite, nitric  
668 oxide, and nitrous oxide respiratory enzymes reveal a complex evolutionary history for  
669 denitrification. *Mol Biol Evol* **25**: 1955–1966.
- 670 Kalbitz K, Schmerwitz J, Schwesig D, Matzner E. (2003). Biodegradation of soil-derived  
671 dissolved organic matter as related to its properties. *Geoderma* **113**: 273–291.
- 672 Kassambara A. (2020). ‘ggpubr’: ‘ggplot2’ Based Publication Ready Plots. *R Packag*  
673 *version 025*. <https://rpkgs.datanovia.com/ggpubr/> (Accessed June 1, 2020).
- 674 Kuzyakov Y, Blagodatskaya E. (2015). Microbial hotspots and hot moments in soil:  
675 Concept & review. *Soil Biol Biochem* **83**: 184–199.
- 676 Lim NYN, Frostegård Å, Bakken LR. (2018). Nitrite kinetics during anoxia: The role of  
677 abiotic reactions versus microbial reduction. *Soil Biol Biochem* **119**: 203–209.
- 678 Lindahl V, Bakken LR. (1995). Evaluation of methods for extraction of bacteria from soil.  
679 *FEMS Microbiol Ecol* **16**: 135–142.
- 680 Liu B, Frostegård Å, Bakken LR. (2014). Impaired reduction of N<sub>2</sub>O to N<sub>2</sub> in acid soils is  
681 due to a posttranscriptional interference with the expression of nosZ Bailey M (ed). *MBio*  
682 **5**: e01383-14.
- 683 Liu B, Mørkved PT, Frostegård Å, Bakken LR. (2010). Denitrification gene pools,  
684 transcription and kinetics of NO, N<sub>2</sub>O and N<sub>2</sub> production as affected by soil pH. *FEMS*  
685 *Microbiol Ecol* **72**: 407–417.
- 686 Lycus P, Bøthun KL, Bergaust L, Shapleigh JP, Bakken LR, Frostegård Å. (2017).  
687 Phenotypic and genotypic richness of denitrifiers revealed by a novel isolation strategy.



- 688 *ISME J* **11**: 2219–2232.
- 689 McMurdie PJ, Holmes S. (2013). phyloseq: an R package for reproducible interactive  
690 analysis and graphics of microbiome census data. *PLoS One* **8**: e61217.
- 691 Molstad L, Dörsch P, Bakken L. (2016). Improved robotized incubation system for gas  
692 kinetics in batch cultures. *ResearchGate*.
- 693 Molstad L, Dörsch P, Bakken LR. (2007). Robotized incubation system for monitoring  
694 gases (O<sub>2</sub>, NO, N<sub>2</sub>O N<sub>2</sub>) in denitrifying cultures. *J Microbiol Methods* **71**: 202–211.
- 695 Morales SE, Cosart T, Holben WE. (2010). Bacterial gene abundances as indicators of  
696 greenhouse gas emission in soils. *ISME J* **4**: 799–808.
- 697 Nadeem S, Almås ÅR, Dörsch P, Bakken LR. (2013). Sequential extraction of denitrifying  
698 organisms from soils; strongly attached cells produce less N<sub>2</sub>O than loosely attached cells.  
699 *Soil Biol Biochem* **67**: 62–69.
- 700 Noble R, Fuhrman J. (1998). Use of SYBR Green I for rapid epifluorescence counts of  
701 marine viruses and bacteria. *Aquat Microb Ecol* **14**: 113–118.
- 702 Pan Y, Ni B-J, Bond PL, Ye L, Yuan Z. (2013). Electron competition among nitrogen  
703 oxides reduction during methanol-utilizing denitrification in wastewater treatment. *Water*  
704 *Res* **47**: 3273–3281.
- 705 Parkin TB. (1987). Soil microsites as a source of denitrification variability. *Soil Sci Soc Am*  
706 *J* **51**: 1194.
- 707 Paulin MM, Nicolaisen MH, Jacobsen CS, Gimsing AL, Sørensen J, Bælum J. (2013).  
708 Improving Griffith's protocol for co-extraction of microbial DNA and RNA in adsorptive  
709 soils. *Soil Biol Biochem* **63**: 37–49.
- 710 Philippot L, Čuhel J, Saby NPA, Chèneby D, Chroňáková A, Bru D, *et al.* (2009). Mapping  
711 field-scale spatial patterns of size and activity of the denitrifier community. *Environ*  
712 *Microbiol* **11**: 1518–1526.
- 713 Quast C, Pruesse E, Yilmaz P, Gerken J, Schweer T, Yarza P, *et al.* (2013). The SILVA  
714 ribosomal RNA gene database project: improved data processing and web-based tools.  
715 *Nucleic Acids Res* **41**: D590–6.

- 716 R Core Team. (2016). R: A language and environment for statistical computing.  
717 <https://www.r-project.org/>.
- 718 Ribera-Guardia A, Kassotaki E, Gutierrez O, Pijuan M. (2014). Effect of carbon source and  
719 competition for electrons on nitrous oxide reduction in a mixed denitrifying microbial  
720 community. *Process Biochem* **49**: 2228–2234.
- 721 Robinson MD, McCarthy DJ, Smyth GK. (2009). edgeR: A Bioconductor package for  
722 differential expression analysis of digital gene expression data. *Bioinformatics*. e-pub ahead  
723 of print, doi: 10.1093/bioinformatics/btp616.
- 724 Roco CA, Bergaust LL, Bakken LR, Yavitt JB, Shapleigh JP. (2017). Modularity of  
725 nitrogen-oxide reducing soil bacteria: linking phenotype to genotype. *Environ Microbiol*  
726 **19**: 2507–2519.
- 727 Samad MS, Biswas A, Bakken LR, Clough TJ, de Klein CAM, Richards KG, *et al.* (2016).  
728 Phylogenetic and functional potential links pH and N<sub>2</sub>O emissions in pasture soils. *Sci Rep*  
729 **6**: 35990.
- 730 Schalk-Otte S, Seviour R., Kuenen J., Jetten MS. (2000). Nitrous oxide (N<sub>2</sub>O) production  
731 by *Alcaligenes faecalis* during feast and famine regimes. *Water Res* **34**: 2080–2088.
- 732 Šimek M, Cooper JE. (2002). The influence of pH on denitrification: Progress towards the  
733 understanding of this interaction over the last fifty years. *Eur J Soil Sci* **53**: 345–354.
- 734 Šimek M, Jiřová L, Hopkins DW. (2002). What is the so-called optimum pH for  
735 denitrification in soil? *Soil Biol Biochem* **34**: 1227–1234.
- 736 Smith MS, Tiedje JM. (1979). Phases of denitrification following oxygen depletion in soil.  
737 *Soil Biol Biochem* **11**: 261–267.
- 738 Syakila A, Kroeze C. (2011). The global nitrous oxide budget revisited. *Greenh Gas Meas*  
739 *Manag* **1**: 17–26.
- 740 Wallenstein MD, Myrold DD, Firestone M, Voytek M. (2006). Environmental controls on  
741 denitrifying communities and denitrification rates: insights from molecular methods. *Ecol*  
742 *Appl* **16**: 2143–52.
- 743 Wang Q, Garrity GM, Tiedje JM, Cole JR. (2007). Naïve Bayesian classifier for rapid

744 assignment of rRNA sequences into the new bacterial taxonomy. *Appl Environ Microbiol.*  
745 e-pub ahead of print, doi: 10.1128/AEM.00062-07.

746 Wang Y, Li P, Zuo J, Gong Y, Wang S, Shi X, *et al.* (2018). Inhibition by free nitrous acid  
747 (FNA) and the electron competition of nitrite in nitrous oxide (N<sub>2</sub>O) reduction during  
748 hydrogenotrophic denitrification. *Chemosphere* **213**: 1–10.

749 Weier KL, Doran JW, Power JF, Walters DT. (1993). Denitrification and the  
750 dinitrogen/nitrous oxide ratio as affected by soil water, available carbon, and nitrate. *Soil*  
751 *Sci Soc Am J* **57**: 66.

752 Wickham H. (2020). forcats: Tools for Working with Categorical Variables. R package  
753 version 0.5.0. <https://cran.r-project.org/package=forcats>.

754 Wickham H, François R, Henry L, Müller K. (2019). dplyr: A Grammar of Data  
755 Manipulation. R package version 0.4.2. <https://cran.r-project.org/package=dplyr>.

756 Zumft WG. (1997). Cell biology and molecular basis of denitrification. *Microbiol Mol Biol*  
757 *Rev* **61**: 533–616.

758

759 **Figure Legends**

760 **Figure 1.** Comparison of parent soils (A) and equivalent unswapped cell based assay  
761 treatments (CBA) from CBA-int (B) and CBA-pH (C) reveal contrasting gas accumulation  
762 patterns. Headspace gases NO (blue), N<sub>2</sub>O (orange), N<sub>2</sub> (black) were quantified every 4hrs  
763 from triplicate (dots, squares, triangles) 3mM NH<sub>4</sub>NO<sub>3</sub> amended anoxic incubations. Note  
764 separate scales between treatments to highlight relative gas accumulation

765 **Figure 2.** Relative ranking of parent soil N<sub>2</sub>O ratios is maintained in equivalent CBA  
766 treatments but lower on an absolute scale. N<sub>2</sub>O ratios summarise the N<sub>2</sub>O emission  
767 potential from 90hr CBA anoxic incubations amended with 3mM NH<sub>4</sub>NO<sub>3</sub> and are  
768 calculated as N<sub>2</sub>O/N<sub>2</sub>O+N<sub>2</sub> at the end of a CBA incubation, where periods of net negative  
769 N<sub>2</sub>O accumulation are ignored to account for multiple gas peaks. Equivalent CBA  
770 treatments include both cells and chemical extracts derived from the parent soil. Results  
771 from triplicate vials per treatment are displayed with 95% confidence intervals.

772 **Figure 3.** Cell and chemical extract origin impact CBA N<sub>2</sub>O ratios and N<sub>2</sub>O emitted (μmol-  
773 N per vial). Standard swap treatments from CBA-int (A,B) or CBA-pH (C,D). N<sub>2</sub>O ratios  
774 and N<sub>2</sub>O emitted summarise the N<sub>2</sub>O emission potential from 90hr CBA anoxic incubations  
775 amended with 3mM NH<sub>4</sub>NO<sub>3</sub> and are calculated as N<sub>2</sub>O/N<sub>2</sub>O+N<sub>2</sub> and total N<sub>2</sub>O  
776 accumulated at the end of a CBA incubation, where periods of net negative N<sub>2</sub>O  
777 accumulation are ignored to account for multiple gas peaks. Results from triplicate vials per  
778 treatment are displayed with 95% confidence intervals. pH of CBA-pH chemical extracts  
779 were buffered at two levels and are labeled accordingly.

780 **Figure 4.** Comparison of independent pH and chemical extract origin changes indicates  
781 similar impact of pH and chemical extract on N<sub>2</sub>O ratios (A) but minor impact of pH on  
782 N<sub>2</sub>O emitted (B). Each symbol compares the change in N<sub>2</sub>O emission potential from 1 of 4  
783 CBA-pH baseline treatments. Filled symbols indicate non-overlapping 95% confidence  
784 intervals for alternative pH or chemical extract changes to the same baseline treatment.  
785 Positive values indicate variable change had expected direction of effect on N<sub>2</sub>O ratio or  
786 emissions i.e. higher pH and LE extracts are expected to decrease N<sub>2</sub>O ratio and emissions,  
787 lower pH and HE extracts vice versa.

788 **Figure 5.** Carbon limitation associated with increased N<sub>2</sub>O accumulation and reduced N<sub>2</sub>  
789 accumulation in CBA-int incubations. Standard treatments (dots), 3mM glutamate amended  
790 treatments (squares). Headspace gases NO (blue), N<sub>2</sub>O (orange), N<sub>2</sub> (black) were quantified  
791 every 4hrs from 3mM NH<sub>4</sub>NO<sub>3</sub> amended anoxic extracted cell and chemistry based  
792 incubations. Average gas accumulation from triplicate (standard treatments) or minimum  
793 duplicate (glutamate amended treatments) vials per treatment are presented. Note separate  
794 scales between treatments to highlight relative gas accumulation.

795 **Figure 6** Extraction bias in microbial communities. Community differences due to cell  
796 extraction are shown using NMDS (A), zeta-diversity (B), and community abundance (C-  
797 D). NMDS shows community dissimilarity (Bray-Curtis), where colours represent origin  
798 soil and shapes extraction source (soil or extracted cells). B depicts shared and unique  
799 ASVs between soil and cell extracted sequences. C depicts differences in phylum level  
800 relative abundance between soil and cell DNA extraction sources. D depicts fold changes in  
801 specific ASVs between soil and cell DNA extraction sources, calculated by dividing ASV  
802 abundance from soil communities, by those from extracted cells. ASV's with significant  
803 changes are labelled by genera.

804 **Tables**

805 **Table 1.** Differences in treatment emission potential indicating strength of cell and chemical extract origin effects for CBA-int and CBA-pH

| CBA-int                         |                                  |            |                                     |            | CBA-pH                          |                                  |              |                                     |              |
|---------------------------------|----------------------------------|------------|-------------------------------------|------------|---------------------------------|----------------------------------|--------------|-------------------------------------|--------------|
| Treatment                       | N <sub>2</sub> O hypo emit ratio | 95% CI     | N <sub>2</sub> O hypo emit (μmol-N) | 95% CI     | Treatment                       | N <sub>2</sub> O hypo emit ratio | 95% CI       | N <sub>2</sub> O hypo emit (μmol-N) | 95% CI       |
| HE cells + HE extract           | 0.39                             | 0.37, 0.42 | 6.34                                | 4.43, 8.25 | HE cells + HE extract (6)       | 0.41                             | 0.38, 0.44   | 4.77                                | 4.04, 5.5    |
| HE cells + LE extract           | 0.18                             | 0.17, 0.19 | 2.32                                | 1.8, 2.84  | HE cells + LE extract (6.6)     | 0.32                             | 0.21, 0.43   | 2.91                                | 2.22, 3.58   |
| LE cells + HE extract           | 0.19                             | 0.18, 0.21 | 3.49                                | 2.76, 4.22 | LE cells + HE extract (6)       | 0.57                             | 0.54, 0.61   | 9.61                                | 8.49, 10.73  |
| LE cells + LE extract           | 0.07                             | 0.05, 0.1  | 1.25                                | 0.9, 1.61  | LE cells + LE extract (6.6)     | 0.12                             | 0.11, 0.14   | 1.19                                | 1.01, 1.36   |
| Cell effect                     | Differences                      |            | Differences                         |            | Cell effect                     | Differences                      |              | Differences                         |              |
| HE, HE vs LE, HE                | 0.20                             | 0.18, 0.22 | 2.85                                | 1.19, 4.52 | HE, HE vs LE, HE                | -0.16*                           | -0.19, -0.13 | -4.85*                              | -5.77, -3.92 |
| HE, LE vs LE, LE                | 0.10                             | 0.08, 0.12 | 1.07*                               | 0.64, 1.49 | HE, LE vs LE, LE                | 0.19*                            | 0.09, 0.3    | 1.72*                               | 1.08, 2.35   |
| Average cell effect             | 0.15                             |            | 1.96                                |            | Average cell effect             | 0.02                             |              | -1.56                               |              |
| Av Directionless cell effect    | 0.15                             |            | 1.96                                |            | Av Directionless cell effect    | 0.18                             |              | 3.28                                |              |
| Extract effect                  | Differences                      |            | Differences                         |            | Extract effect                  | Differences                      |              | Differences                         |              |
| HE, HE vs HE, LE                | 0.21                             | 0.19, 0.24 | 4.02                                | 2.26, 5.78 | HE, HE vs HE, LE                | 0.09*                            | -0.01, 0.2   | 1.86*                               | 1.22, 2.51   |
| LE, HE vs LE, LE                | 0.12                             | 0.1, 0.14  | 2.23*                               | 1.62, 2.84 | LE, HE vs LE, LE                | 0.45*                            | 0.42, 0.48   | 8.43*                               | 7.34, 9.51   |
| Average extract effect          | 0.17                             |            | 3.13                                |            | Average extract effect          | 0.27                             |              | 5.14                                |              |
| Av Directionless extract effect | 0.17                             |            | 3.13                                |            | Av Directionless extract effect | 0.27                             |              | 5.14                                |              |

806

807 Emission potential differences are expressed relative to the HE extract or cells. Positive values indicate reduced N<sub>2</sub>O emission potential when comparatively LE  
 808 extracts or cells were used.

809 Average cell effects are calculated using signed difference values while average directionless cell effects are calculated using absolute values

810 \* Indicates difference values have non-overlapping confidence intervals with the appropriate comparison. Direct comparison of cell vs. chemical extract  
 811 difference values should be compared relative to the equivalent baseline treatment i.e. HE, HE vs. LE, HE compared with HE, HE vs. HE, LE.

812 **Table 2.** CBA-pH: Difference in N<sub>2</sub>O hypo emit (ratio) associated with independent treatment difference in pH or chemical extract relative to a  
 813 baseline sample

| Difference in N <sub>2</sub> O hypo emit ratio for treatments varying in: |         |              |       |              |                     |              |                                                                     |  |
|---------------------------------------------------------------------------|---------|--------------|-------|--------------|---------------------|--------------|---------------------------------------------------------------------|--|
| Baseline sample                                                           | Extract | 95% CI       | pH    | 95% CI       | Extract + pH actual | 95% CI       | Extract + pH predicted (sum independent extract and pH differences) |  |
| 6 HEC + HEE                                                               | -0.03   | -0.08, 0.01  | -0.03 | -0.33, 0.28  | -0.09               | -0.2, 0.01   | -0.06                                                               |  |
| 6.6 HEC + LEE                                                             | 0.07    | -0.21, 0.08  | 0.06  | -0.03, 0.15  | 0.09                | -0.01, 0.2   | 0.13                                                                |  |
| 6 LEC + HEE                                                               | -0.33   | -0.52, -0.15 | -0.26 | -0.29, -0.23 | -0.45               | -0.48, -0.42 | -0.59                                                               |  |
| 6.6 LEC + LEE                                                             | 0.19    | 0.17, 0.21   | 0.12  | -0.13, 0.36  | 0.45                | 0.42, 0.48   | 0.31                                                                |  |

  

| Difference in N <sub>2</sub> O hypo emit (μmol-N) for treatments varying in: |         |              |        |              |                     |              |                                                                     |  |
|------------------------------------------------------------------------------|---------|--------------|--------|--------------|---------------------|--------------|---------------------------------------------------------------------|--|
| Baseline sample                                                              | Extract | 95% CI       | pH     | 95% CI       | Extract + pH actual | 95% CI       | Extract + pH predicted (sum independent extract and pH differences) |  |
| 6 HE + HE                                                                    | -1.74   | -2.52, -0.96 | 0.98   | -2.31, 4.26  | -1.86               | -2.49, -1.23 | -0.76                                                               |  |
| 6.6 HE + LE                                                                  | 2.84    | -0.73, 6.4   | 0.12   | -0.88, 0.65  | 1.86                | 1.23, 2.49   | 2.96                                                                |  |
| 6 LE + HE                                                                    | -7.17*  | -8.37, -5.99 | -2.88* | -3.85, -1.93 | -8.42               | -9.51, -7.34 | -10.06                                                              |  |
| 6.6 LE + LE                                                                  | 5.54*   | 5.12, 5.96   | 1.25*  | -1.54, 4.04  | 8.42                | 7.34, 9.51   | 6.78                                                                |  |

814

815 Negative values indicate a lower N<sub>2</sub>O ratio or hypothetical emissions relative to the baseline sample

816 \* Indicates pH and chemical extract difference values have non overlapping confidence intervals for equivalent baseline samples (same row)

A

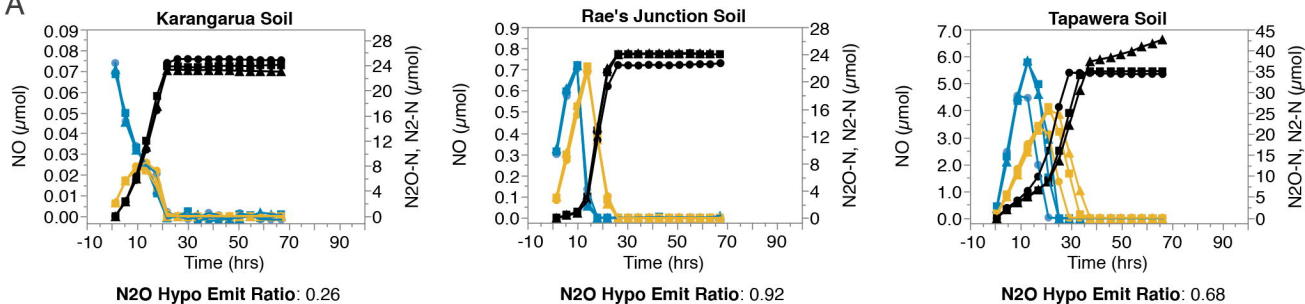

B

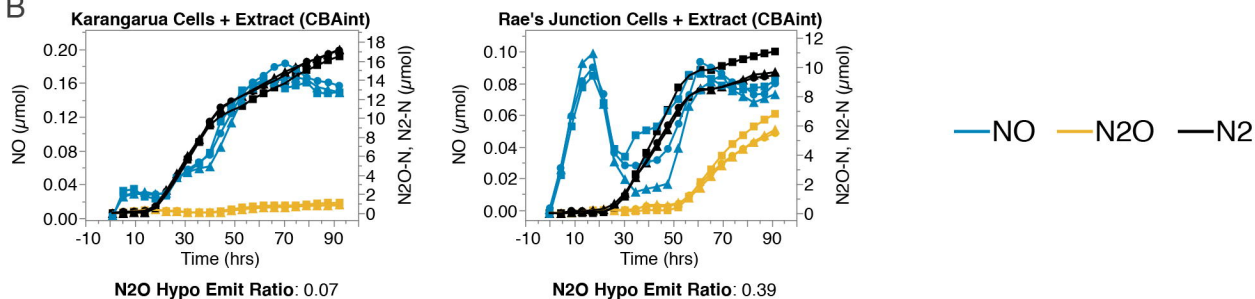

C

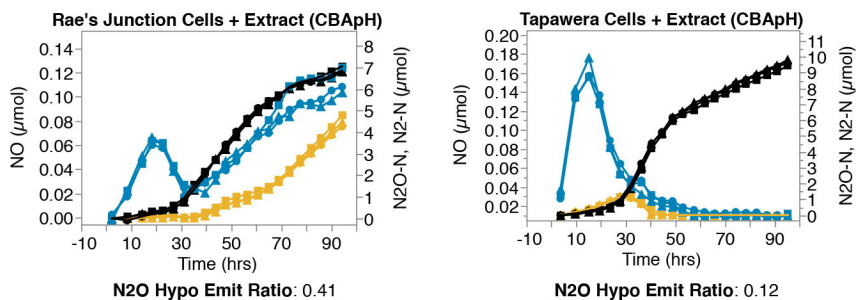



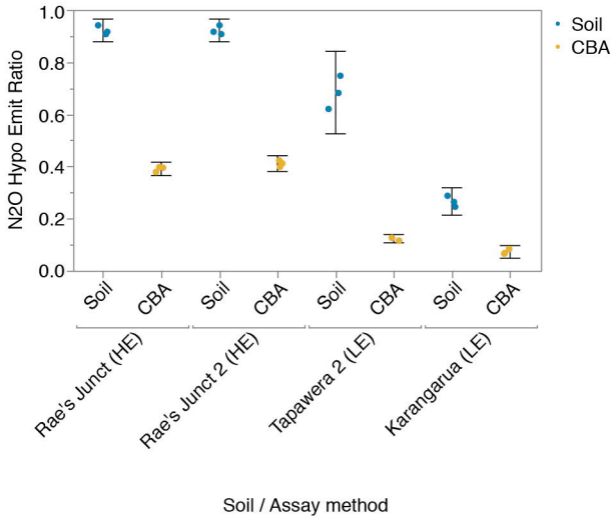

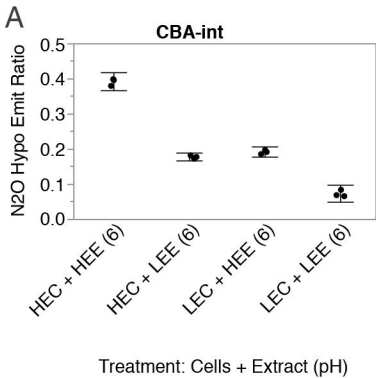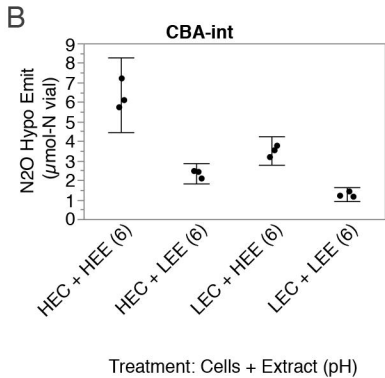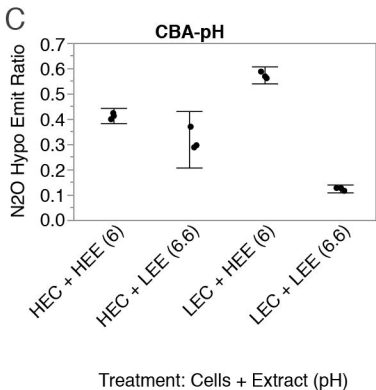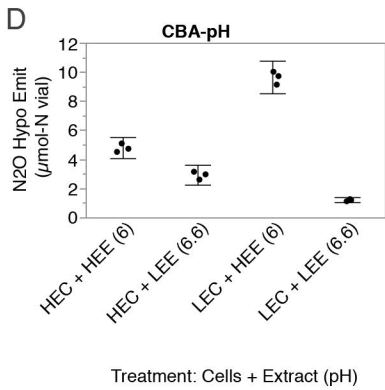

**A**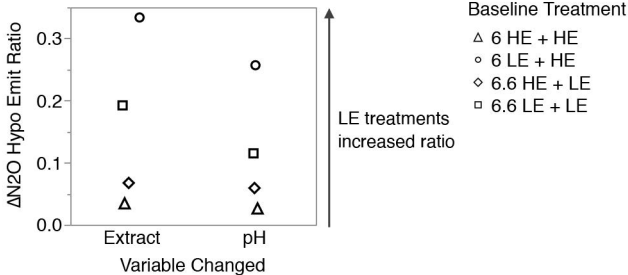**B**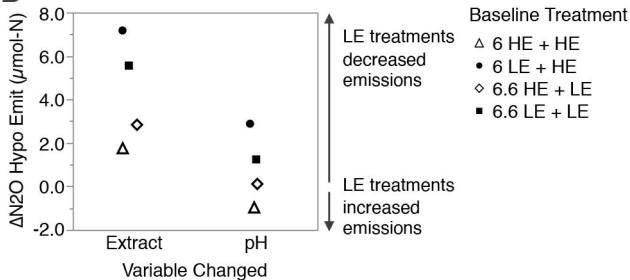

**HEC + HEE Glutamate Amended**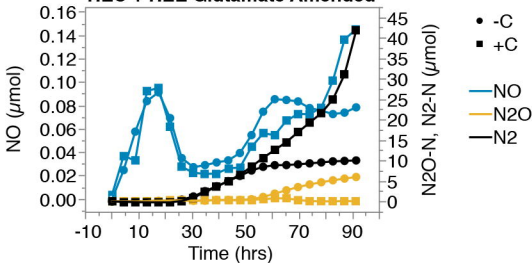**HEC + LEE Glutamate Amended**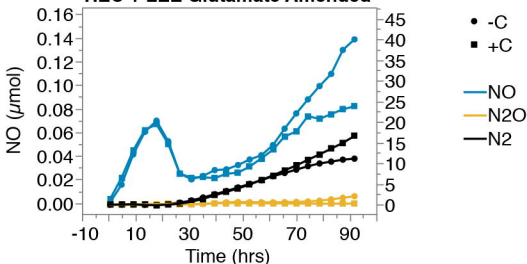**LEC + HEE Glutamate Amended**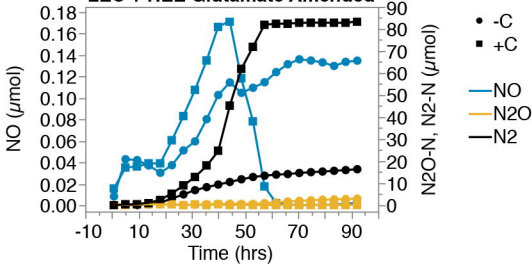**LEC + LEE Glutamate Amended**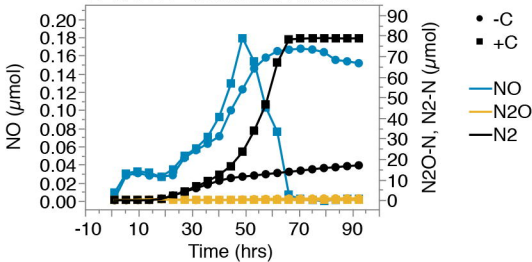

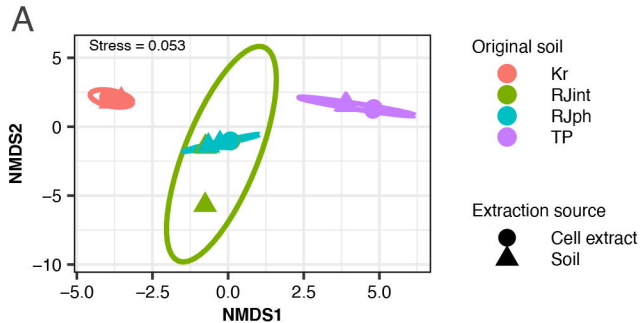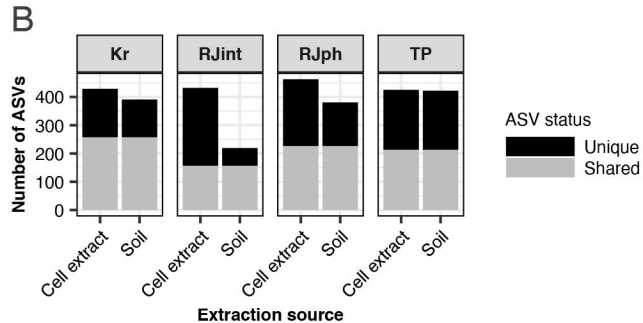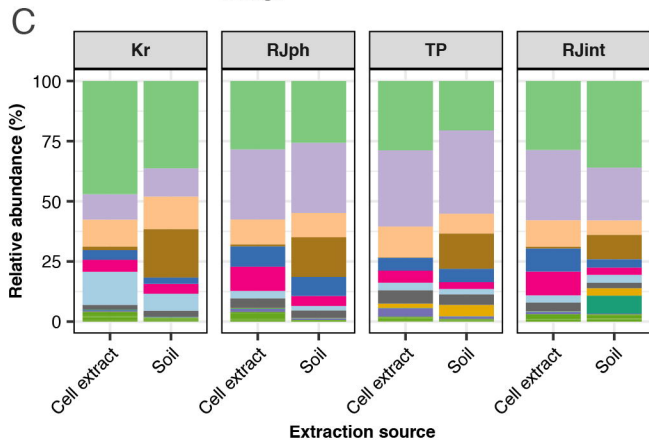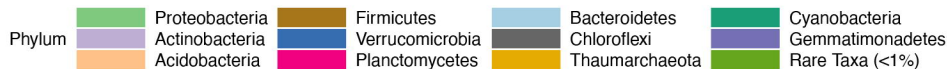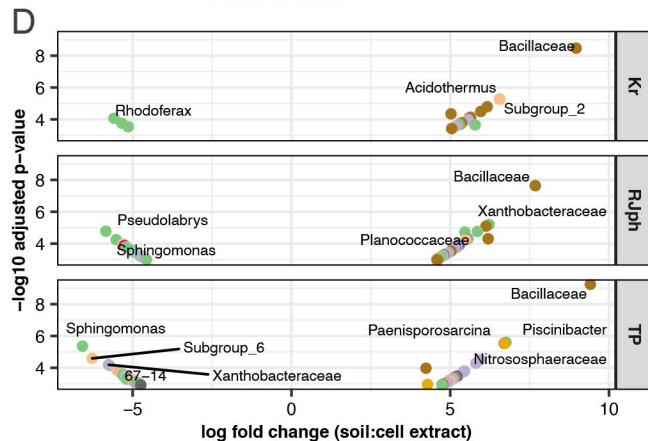

Source: http://biorxiv.org/content/10.1101/2020.12.16.422796v1.full.pdf
